# Supplementary material for: An Algorithm for Testing the Efficient Market Hypothesis
Source: PLoS One. 2013 Oct 29;8(10):e78177. doi: 10.1371/journal.pone.0078177 (PMC3812129; doi:10.1371/journal.pone.0078177)
Supplement: Materials S1 — This file contains the parameters of the individuals generated by the genetic algorithm. There are three sheets, each one containing the parameters (genes) of the individuals generated in each simulation. The first sheet contains the genes’ values of the 100 individuals generated by the first simulation. The second and the third sheet contain the genes’ values of the individuals generated by the additional two simulations. (XLS) [file pone.0078177.s001.xls]

## Sheet: Simulation1
Individual	Boolean_EMA	Nr_periods_EMA	Boolean_MACD	Periods_short_MA	Periods_long_MA	Periods_signal_MACD	Boolean_signal	Boolean_RSI	Periods_RSI	Oversold_signal_RSI	Overbought_signal_RSI	Boolean_signal_RSI	Boolean_Filter	Periods_Filter	Increase_signal_Filter	Decrease_signal_Filter	Boolean_trader_type_Filter	Boolean_fixed_exit	TP_fixed	SL_fixed	Boolean_trailing_exit	TP_trailing	SL_trailing	Trailing_level	nbTransactionsTraining	trainingProfit	trainingProfitNoCost	nbTransactionsTesting	testingProfit	testingProfitNoCost
1	FALSE	72	FALSE	6	45	6	TRUE	FALSE	49	34	65	FALSE	TRUE	11	77	82	TRUE	FALSE	52	10	TRUE	138	55	77	33	2266	2322.1	35	-847	-787.5
2	FALSE	85	FALSE	23	100	18	TRUE	TRUE	17	20	69	TRUE	FALSE	12	78	57	FALSE	FALSE	79	44	TRUE	125	60	52	51	1493	1579.7	53	-944	-853.9
3	FALSE	44	FALSE	28	29	6	TRUE	TRUE	20	24	73	FALSE	TRUE	8	83	54	TRUE	FALSE	16	19	TRUE	140	84	58	34	1950	2007.8	32	-260	-205.6
4	FALSE	46	FALSE	22	51	10	FALSE	TRUE	9	27	77	FALSE	TRUE	13	65	91	TRUE	TRUE	140	83	FALSE	115	73	52	57	1959	2055.9	41	-504	-434.3
5	FALSE	28	FALSE	6	16	18	TRUE	TRUE	6	21	80	FALSE	FALSE	11	62	76	TRUE	FALSE	60	92	TRUE	114	87	23	44	1697	1771.8	34	860	917.8
6	FALSE	41	FALSE	11	43	11	TRUE	TRUE	5	29	65	FALSE	TRUE	2	94	55	FALSE	TRUE	34	97	FALSE	62	64	21	162	2102	2377.4	105	557	735.5
7	FALSE	61	FALSE	5	71	5	TRUE	TRUE	17	27	69	TRUE	TRUE	3	100	72	FALSE	FALSE	46	94	TRUE	94	79	32	43	2114	2187.1	41	-26	43.7
8	FALSE	32	FALSE	13	92	14	TRUE	TRUE	25	17	70	FALSE	FALSE	9	99	71	FALSE	FALSE	37	45	TRUE	112	91	52	25	1563	1605.5	24	-1144	-1103.2
9	FALSE	56	FALSE	12	80	13	FALSE	TRUE	11	34	82	TRUE	TRUE	2	66	95	FALSE	FALSE	82	10	TRUE	89	53	11	74	1737	1862.8	82	-378	-238.6
10	FALSE	25	FALSE	6	100	23	TRUE	TRUE	5	29	68	FALSE	TRUE	2	60	51	FALSE	TRUE	87	83	FALSE	108	51	32	85	2635	2779.5	58	-224	-125.4
11	FALSE	78	FALSE	10	29	15	FALSE	TRUE	27	18	65	FALSE	TRUE	12	65	94	TRUE	FALSE	147	99	TRUE	94	78	12	49	1626	1709.3	46	-836	-757.8
12	FALSE	29	FALSE	11	91	17	TRUE	TRUE	8	25	66	TRUE	TRUE	2	82	53	FALSE	FALSE	46	52	TRUE	110	70	72	51	2190	2276.7	40	-568	-500
13	FALSE	70	FALSE	8	52	25	FALSE	TRUE	5	29	66	FALSE	TRUE	3	78	98	FALSE	FALSE	144	34	TRUE	43	61	33	149	2636	2889.3	126	429	643.2
14	FALSE	37	FALSE	10	43	12	TRUE	TRUE	26	35	74	FALSE	TRUE	2	97	69	FALSE	TRUE	119	97	FALSE	80	71	21	41	1639	1708.7	29	643	692.3
15	FALSE	20	FALSE	10	99	21	TRUE	TRUE	22	32	69	FALSE	FALSE	5	92	57	FALSE	TRUE	145	95	FALSE	87	37	26	37	1525	1587.9	29	365	414.3
16	FALSE	63	FALSE	29	76	16	TRUE	TRUE	19	33	78	TRUE	TRUE	4	87	98	TRUE	FALSE	102	90	TRUE	149	72	79	30	2106	2157	32	619	673.4
17	FALSE	32	TRUE	27	50	24	TRUE	TRUE	42	16	74	FALSE	TRUE	12	77	62	TRUE	TRUE	146	96	FALSE	125	99	12	40	1726	1794	29	120	169.3
18	FALSE	56	TRUE	24	58	18	FALSE	FALSE	47	27	84	TRUE	TRUE	12	100	66	TRUE	FALSE	89	70	TRUE	88	94	15	43	1608	1681.1	46	-840	-761.8
19	FALSE	88	FALSE	9	82	11	TRUE	FALSE	42	19	65	FALSE	TRUE	11	65	91	TRUE	TRUE	139	94	FALSE	97	55	21	41	1971	2040.7	30	-257	-206
20	FALSE	32	FALSE	18	27	12	TRUE	TRUE	5	15	71	FALSE	TRUE	9	82	59	FALSE	FALSE	116	19	TRUE	43	79	11	99	1648	1816.3	86	-103	43.2
21	TRUE	42	FALSE	6	99	16	TRUE	TRUE	22	32	67	TRUE	TRUE	15	56	94	TRUE	TRUE	140	90	FALSE	48	11	18	42	1970	2041.4	34	390	447.8
22	FALSE	74	TRUE	26	27	13	TRUE	FALSE	36	32	69	FALSE	FALSE	15	56	94	FALSE	TRUE	109	99	FALSE	30	81	27	53	1617	1707.1	46	230	308.2
23	FALSE	28	FALSE	19	18	13	FALSE	TRUE	7	29	76	TRUE	TRUE	4	94	99	FALSE	FALSE	70	34	TRUE	74	81	33	51	2134	2220.7	46	-47	31.2
24	FALSE	42	TRUE	27	69	9	FALSE	FALSE	20	35	77	TRUE	TRUE	10	52	70	TRUE	TRUE	61	48	FALSE	124	89	37	172	1663	1955.4	131	143	365.7
25	FALSE	54	FALSE	25	32	16	FALSE	TRUE	16	24	75	FALSE	TRUE	6	99	85	TRUE	FALSE	72	89	TRUE	141	70	65	35	2311	2370.5	36	-50	11.2
26	FALSE	86	FALSE	23	79	22	FALSE	TRUE	8	31	80	TRUE	FALSE	5	74	71	TRUE	FALSE	16	96	TRUE	147	52	37	77	1611	1741.9	82	-1341	-1201.6
27	FALSE	81	FALSE	17	69	15	TRUE	TRUE	16	18	78	TRUE	TRUE	13	88	67	TRUE	FALSE	91	96	TRUE	115	96	23	32	2034	2088.4	34	-757	-699.2
28	FALSE	20	FALSE	14	60	24	FALSE	TRUE	10	23	72	FALSE	TRUE	7	90	78	FALSE	TRUE	102	92	FALSE	90	20	52	62	2056	2161.4	46	230	308.2
29	FALSE	81	FALSE	16	40	19	TRUE	FALSE	33	15	83	FALSE	TRUE	6	58	71	TRUE	FALSE	97	48	TRUE	118	87	80	29	1987	2036.3	28	-1066	-1018.4
30	FALSE	73	TRUE	26	42	10	FALSE	TRUE	29	35	67	FALSE	FALSE	12	70	77	TRUE	TRUE	128	61	FALSE	74	64	54	76	1601	1730.2	49	413	496.3
31	FALSE	8	FALSE	10	74	25	FALSE	TRUE	28	33	72	TRUE	TRUE	6	55	62	TRUE	TRUE	147	79	FALSE	63	65	21	51	1847	1933.7	40	4	72
32	FALSE	31	TRUE	16	36	13	TRUE	TRUE	33	25	85	FALSE	TRUE	14	85	78	FALSE	TRUE	40	81	FALSE	81	67	25	174	1394	1689.8	133	-488	-261.9
33	FALSE	16	FALSE	19	31	19	TRUE	TRUE	11	34	74	TRUE	TRUE	4	70	64	FALSE	FALSE	92	35	TRUE	26	56	12	202	1546	1889.4	162	118	393.4
34	FALSE	90	FALSE	14	93	22	FALSE	FALSE	35	29	72	FALSE	TRUE	11	69	87	TRUE	FALSE	70	52	TRUE	132	60	71	44	1862	1936.8	38	-576	-511.4
35	FALSE	80	TRUE	12	21	9	TRUE	TRUE	18	28	82	FALSE	FALSE	10	64	76	FALSE	TRUE	110	48	FALSE	26	53	25	104	1644	1820.8	83	282	423.1
36	FALSE	53	FALSE	27	64	5	TRUE	FALSE	14	21	85	TRUE	TRUE	13	74	94	TRUE	TRUE	145	92	FALSE	131	57	48	42	2535	2606.4	28	-206	-158.4
37	FALSE	34	TRUE	29	74	10	FALSE	FALSE	27	25	78	FALSE	TRUE	10	69	93	TRUE	FALSE	79	13	TRUE	77	91	14	45	1771	1847.5	44	140	214.8
38	FALSE	37	FALSE	23	68	7	FALSE	TRUE	17	21	85	TRUE	TRUE	15	81	91	TRUE	FALSE	61	73	TRUE	92	89	28	36	1804	1865.2	34	-702	-644.2
39	FALSE	57	FALSE	10	20	24	TRUE	TRUE	16	17	79	FALSE	TRUE	15	82	53	TRUE	FALSE	66	34	TRUE	132	77	22	44	2420	2494.8	47	-737	-657.1
40	FALSE	20	FALSE	18	75	14	TRUE	TRUE	11	25	84	TRUE	TRUE	4	65	83	FALSE	TRUE	148	65	FALSE	54	11	76	51	2010	2096.7	36	216	277.2
41	FALSE	37	FALSE	25	41	19	TRUE	TRUE	22	23	66	TRUE	TRUE	12	81	73	TRUE	FALSE	73	21	TRUE	105	69	46	48	1544	1625.6	48	-562	-480.4
42	FALSE	57	FALSE	17	92	16	TRUE	TRUE	29	35	67	TRUE	TRUE	6	67	53	TRUE	FALSE	127	79	TRUE	127	91	20	37	2391	2453.9	38	140	204.6
43	FALSE	74	FALSE	14	60	18	TRUE	TRUE	9	25	76	TRUE	TRUE	4	100	81	FALSE	FALSE	68	56	TRUE	77	85	64	71	1793	1913.7	50	726	811
44	FALSE	80	FALSE	15	87	8	FALSE	TRUE	20	16	81	FALSE	FALSE	15	57	79	TRUE	FALSE	23	15	TRUE	88	88	49	15	1903	1928.5	14	-566	-542.2
45	FALSE	6	FALSE	5	79	7	TRUE	TRUE	30	15	68	TRUE	TRUE	15	88	82	TRUE	TRUE	149	97	FALSE	45	50	48	45	1785	1861.5	31	191	243.7
46	FALSE	40	FALSE	26	91	17	FALSE	TRUE	22	29	85	FALSE	TRUE	15	61	98	TRUE	TRUE	144	92	FALSE	16	36	10	48	1956	2037.6	38	-192	-127.4
47	FALSE	41	FALSE	24	89	14	TRUE	TRUE	40	26	74	TRUE	TRUE	11	79	71	TRUE	TRUE	136	64	FALSE	16	32	11	56	1816	1911.2	42	-488	-416.6
48	FALSE	28	FALSE	20	35	25	TRUE	TRUE	7	20	78	TRUE	TRUE	15	65	82	TRUE	TRUE	138	67	FALSE	105	23	17	74	2012	2137.8	52	-614	-525.6
49	FALSE	86	TRUE	28	68	10	FALSE	TRUE	47	22	74	FALSE	TRUE	12	84	95	TRUE	TRUE	148	86	FALSE	33	55	14	47	1574	1653.9	40	-164	-96
50	FALSE	55	FALSE	10	61	17	TRUE	TRUE	8	18	77	TRUE	FALSE	9	67	91	TRUE	TRUE	139	86	FALSE	145	87	32	52	1828	1916.4	34	1	58.8
51	FALSE	44	FALSE	26	81	18	TRUE	TRUE	10	31	82	TRUE	TRUE	3	88	93	FALSE	TRUE	145	84	FALSE	131	29	52	53	2418	2508.1	38	-215	-150.4
52	FALSE	17	TRUE	18	19	22	TRUE	FALSE	10	33	76	TRUE	FALSE	14	62	91	TRUE	TRUE	106	98	FALSE	71	67	11	63	1374	1481.1	51	-102	-15.3
53	FALSE	7	FALSE	7	75	7	FALSE	FALSE	6	31	67	TRUE	TRUE	7	66	52	TRUE	TRUE	131	94	FALSE	115	69	42	51	1731	1817.7	30	-120	-69
54	FALSE	81	FALSE	11	53	20	TRUE	TRUE	26	30	68	TRUE	FALSE	8	64	84	FALSE	FALSE	61	41	TRUE	148	76	74	24	2176	2216.8	34	-510	-452.2
55	FALSE	9	TRUE	18	89	21	FALSE	TRUE	32	19	67	TRUE	TRUE	6	79	64	FALSE	FALSE	22	44	TRUE	37	100	23	130	1693	1914	100	-426	-256
56	FALSE	23	FALSE	26	60	10	FALSE	TRUE	22	25	71	FALSE	TRUE	2	87	79	FALSE	FALSE	110	64	TRUE	132	89	17	29	1941	1990.3	37	-1049	-986.1
57	FALSE	68	FALSE	13	86	9	TRUE	FALSE	22	16	81	TRUE	TRUE	11	80	93	TRUE	TRUE	143	95	FALSE	109	32	18	42	1722	1793.4	25	243	285.5
58	FALSE	75	FALSE	24	92	25	FALSE	TRUE	19	33	75	FALSE	TRUE	13	73	63	TRUE	FALSE	108	19	TRUE	119	79	21	45	2313	2389.5	46	-613	-534.8
59	FALSE	86	TRUE	23	73	19	FALSE	TRUE	12	30	82	TRUE	TRUE	8	59	50	TRUE	FALSE	115	58	TRUE	99	61	39	72	1314	1436.4	56	449	544.2
60	FALSE	6	FALSE	20	79	14	TRUE	FALSE	10	17	81	FALSE	TRUE	14	73	87	TRUE	TRUE	149	96	FALSE	59	75	50	40	1795	1863	28	7	54.6
61	FALSE	34	FALSE	21	34	16	FALSE	TRUE	10	26	81	FALSE	TRUE	14	60	72	TRUE	FALSE	28	91	TRUE	139	55	64	58	1612	1710.6	62	-530	-424.6
62	FALSE	47	FALSE	26	50	5	TRUE	TRUE	14	32	83	TRUE	TRUE	14	85	99	TRUE	TRUE	139	97	FALSE	39	74	26	49	1619	1702.3	32	-36	18.4
63	FALSE	29	FALSE	9	31	17	TRUE	FALSE	39	21	68	FALSE	TRUE	13	67	61	TRUE	FALSE	102	90	TRUE	133	83	46	36	1888	1949.2	36	-734	-672.8
64	FALSE	38	TRUE	28	36	5	TRUE	TRUE	24	22	73	TRUE	TRUE	6	70	94	FALSE	TRUE	56	93	FALSE	57	58	55	114	1616	1809.8	82	718	857.4
65	FALSE	24	FALSE	29	48	22	TRUE	TRUE	15	28	81	TRUE	TRUE	4	77	92	FALSE	FALSE	44	85	TRUE	115	58	38	50	1605	1690	56	-187	-91.8
66	FALSE	84	FALSE	18	77	14	FALSE	TRUE	39	34	77	FALSE	TRUE	15	94	81	TRUE	TRUE	139	70	FALSE	114	75	17	58	2001	2099.6	37	-82	-19.1
67	FALSE	15	FALSE	15	27	24	TRUE	TRUE	9	32	74	FALSE	FALSE	7	87	61	FALSE	TRUE	145	62	FALSE	134	24	50	60	2076	2178	50	-616	-531
68	FALSE	25	TRUE	29	43	15	FALSE	FALSE	17	31	82	FALSE	TRUE	14	70	97	TRUE	TRUE	60	56	FALSE	98	11	57	152	1696	1954.4	122	12	219.4
69	FALSE	51	FALSE	19	52	11	TRUE	FALSE	30	31	68	TRUE	TRUE	12	94	89	TRUE	TRUE	144	95	FALSE	101	30	59	39	1792	1858.3	25	-224	-181.5
70	FALSE	32	FALSE	29	52	21	TRUE	FALSE	16	23	76	FALSE	TRUE	10	79	81	TRUE	FALSE	105	94	TRUE	138	80	28	37	1800	1862.9	30	-580	-529
71	FALSE	17	FALSE	9	47	21	TRUE	TRUE	14	20	75	TRUE	FALSE	6	87	61	TRUE	FALSE	48	53	TRUE	139	68	37	36	1807	1868.2	44	-550	-475.2
72	FALSE	7	TRUE	13	34	18	TRUE	TRUE	26	27	69	FALSE	TRUE	7	75	88	TRUE	TRUE	64	93	FALSE	34	53	32	103	1725	1900.1	77	1003	1133.9
73	FALSE	81	FALSE	6	64	11	TRUE	TRUE	12	18	75	FALSE	TRUE	3	76	70	FALSE	TRUE	108	76	FALSE	130	63	47	61	1988	2091.7	41	380	449.7
74	FALSE	78	FALSE	23	34	17	TRUE	TRUE	12	26	75	TRUE	TRUE	3	78	62	FALSE	FALSE	143	32	TRUE	100	83	24	46	2503	2581.2	40	757	825
75	FALSE	10	TRUE	25	43	6	TRUE	TRUE	20	29	79	TRUE	FALSE	9	73	62	FALSE	TRUE	31	90	FALSE	73	91	59	206	1546	1896.2	161	272	545.7
76	FALSE	68	FALSE	10	72	8	TRUE	FALSE	49	24	82	TRUE	TRUE	11	76	80	TRUE	TRUE	148	79	FALSE	95	64	75	45	1893	1969.5	32	-258	-203.6
77	FALSE	45	TRUE	28	40	18	FALSE	FALSE	45	24	71	FALSE	TRUE	8	68	98	TRUE	TRUE	132	57	FALSE	92	84	66	79	1734	1868.3	63	0	107.1
78	FALSE	70	FALSE	5	47	7	TRUE	TRUE	11	19	76	TRUE	TRUE	4	99	79	FALSE	FALSE	50	90	TRUE	103	82	28	42	1787	1858.4	42	-403	-331.6
79	FALSE	30	FALSE	25	46	5	TRUE	FALSE	12	29	82	FALSE	TRUE	11	68	88	TRUE	TRUE	138	70	FALSE	15	58	10	47	1910	1989.9	39	-234	-167.7
80	FALSE	21	FALSE	18	62	12	TRUE	TRUE	5	29	66	FALSE	FALSE	10	86	92	TRUE	FALSE	68	62	TRUE	55	88	26	69	2118	2235.3	68	-745	-629.4
81	FALSE	38	FALSE	12	75	22	FALSE	FALSE	48	33	81	FALSE	TRUE	13	99	87	TRUE	TRUE	145	92	FALSE	82	50	66	43	1969	2042.1	23	-457	-417.9
82	FALSE	40	FALSE	10	55	16	TRUE	TRUE	18	16	73	TRUE	TRUE	2	70	64	FALSE	FALSE	93	27	TRUE	105	57	64	47	1945	2024.9	53	-1067	-976.9
83	FALSE	32	FALSE	30	97	10	TRUE	FALSE	11	15	73	TRUE	TRUE	14	66	55	TRUE	TRUE	136	88	FALSE	120	49	55	57	1704	1800.9	39	-520	-453.7
84	FALSE	63	FALSE	13	56	24	TRUE	TRUE	14	17	79	TRUE	TRUE	3	88	94	FALSE	FALSE	118	20	TRUE	113	95	26	30	2272	2323	32	-778	-723.6
85	FALSE	33	FALSE	18	18	9	TRUE	FALSE	28	17	85	TRUE	TRUE	8	71	90	TRUE	FALSE	86	66	TRUE	97	98	41	25	2050	2092.5	20	-156	-122
86	FALSE	78	FALSE	17	52	13	TRUE	TRUE	6	35	80	TRUE	TRUE	3	83	97	FALSE	FALSE	97	44	TRUE	101	100	60	35	2752	2811.5	27	264	309.9
87	FALSE	10	FALSE	13	52	5	TRUE	TRUE	27	15	66	FALSE	TRUE	15	77	68	TRUE	FALSE	88	49	TRUE	135	80	13	42	2523	2594.4	46	-930	-851.8
88	FALSE	72	FALSE	14	11	7	FALSE	TRUE	14	15	66	TRUE	TRUE	3	84	84	FALSE	FALSE	145	62	TRUE	133	70	13	54	1826	1917.8	46	147	225.2
89	FALSE	33	FALSE	26	89	12	TRUE	TRUE	31	19	83	FALSE	TRUE	11	72	77	TRUE	TRUE	144	60	FALSE	143	43	16	52	1572	1660.4	42	-684	-612.6
90	FALSE	67	TRUE	17	37	14	TRUE	FALSE	10	35	77	TRUE	FALSE	2	89	61	TRUE	TRUE	55	94	FALSE	93	41	20	115	2004	2199.5	83	691	832.1
91	FALSE	9	FALSE	13	57	12	FALSE	TRUE	27	19	82	FALSE	TRUE	14	66	82	TRUE	FALSE	97	52	TRUE	97	96	28	36	1740	1801.2	32	-751	-696.6
92	FALSE	79	FALSE	9	67	23	TRUE	TRUE	7	19	68	FALSE	TRUE	2	64	78	FALSE	TRUE	86	92	FALSE	87	19	24	75	2356	2483.5	49	120	203.3
93	FALSE	84	FALSE	8	43	5	TRUE	TRUE	10	33	78	TRUE	TRUE	8	76	89	FALSE	FALSE	88	87	TRUE	26	70	12	170	1984	2273	119	346	548.3
94	FALSE	45	TRUE	19	72	8	FALSE	TRUE	39	20	68	FALSE	FALSE	4	59	50	TRUE	FALSE	52	52	TRUE	35	58	28	233	1470	1866.1	175	-281	16.5
95	FALSE	68	FALSE	10	74	23	FALSE	TRUE	26	25	68	FALSE	FALSE	14	67	57	FALSE	FALSE	41	23	TRUE	116	81	12	30	1965	2016	36	-1284	-1222.8
96	FALSE	33	TRUE	23	64	6	FALSE	TRUE	45	28	69	FALSE	TRUE	12	82	62	TRUE	FALSE	50	95	TRUE	68	93	26	44	1870	1944.8	48	-513	-431.4
97	FALSE	83	FALSE	8	30	19	TRUE	TRUE	16	22	81	FALSE	TRUE	1	62	73	FALSE	FALSE	149	48	TRUE	123	54	42	35	2202	2261.5	38	-489	-424.4
98	FALSE	61	TRUE	5	18	21	TRUE	TRUE	25	35	80	TRUE	FALSE	13	51	79	TRUE	TRUE	109	49	FALSE	20	91	23	109	1453	1638.3	87	-313	-165.1
99	FALSE	74	FALSE	9	71	13	TRUE	TRUE	22	18	79	FALSE	TRUE	15	80	64	TRUE	FALSE	39	53	TRUE	128	77	26	41	2433	2502.7	43	-298	-224.9
100	FALSE	63	FALSE	13	53	10	TRUE	TRUE	33	29	68	TRUE	TRUE	10	76	57	TRUE	FALSE	33	41	TRUE	130	90	20	37	2290	2352.9	37	-410	-347.1

## Sheet: Simulation2
Individual	Boolean_EMA	Nr_periods_EMA	Boolean_MACD	Periods_short_MA	Periods_long_MA	Periods_signal_MACD	Boolean_signal	Boolean_RSI	Periods_RSI	Oversold_signal_RSI	Overbought_signal_RSI	Boolean_signal_RSI	Boolean_Filter	Periods_Filter	Increase_signal_Filter	Decrease_signal_Filter	Boolean_trader_type_Filter	Boolean_fixed_exit	TP_fixed	SL_fixed	Boolean_trailing_exit	TP_trailing	SL_trailing	Trailing_level	nbTransactionsTraining	trainingProfit	trainingProfitNoCost	nbTransactionsTesting	testingProfit	testingProfitNoCost
1	FALSE	44	TRUE	20	27	8	TRUE	FALSE	8	31	72	TRUE	TRUE	2	99	96	FALSE	TRUE	110	50	FALSE	20	94	12	104	1360	1536.8	83	-150	-8.9
2	FALSE	34	FALSE	29	55	8	TRUE	TRUE	13	26	74	FALSE	FALSE	6	64	71	FALSE	FALSE	46	73	TRUE	86	75	18	47	1978	2057.9	44	-493	-418.2
3	FALSE	15	TRUE	25	32	12	TRUE	FALSE	14	24	78	TRUE	FALSE	10	81	95	TRUE	FALSE	140	16	TRUE	58	95	71	110	1637	1824	78	1005	1137.6
4	FALSE	80	FALSE	7	49	24	TRUE	TRUE	23	16	76	FALSE	TRUE	11	70	77	TRUE	TRUE	150	31	FALSE	33	61	10	93	1823	1981.1	76	-546	-416.8
5	FALSE	36	FALSE	26	33	12	TRUE	TRUE	26	35	69	FALSE	FALSE	7	57	92	TRUE	FALSE	141	99	TRUE	146	65	66	31	1892	1944.7	36	181	242.2
6	FALSE	30	FALSE	13	77	15	TRUE	FALSE	12	20	73	TRUE	TRUE	13	71	71	TRUE	FALSE	70	94	TRUE	92	92	26	37	1880	1942.9	34	-1176	-1118.2
7	FALSE	74	FALSE	14	50	9	TRUE	TRUE	10	35	73	TRUE	TRUE	3	92	88	FALSE	TRUE	134	67	FALSE	22	80	13	67	2345	2458.9	43	-67	6.1
8	FALSE	43	FALSE	26	73	13	TRUE	TRUE	10	21	66	TRUE	TRUE	2	58	57	TRUE	TRUE	147	92	FALSE	74	67	28	48	2037	2118.6	33	-168	-111.9
9	FALSE	37	TRUE	19	66	23	FALSE	TRUE	50	21	77	TRUE	TRUE	14	71	79	TRUE	FALSE	89	39	TRUE	59	57	48	150	1738	1993	107	53	234.9
10	FALSE	54	FALSE	11	58	21	TRUE	FALSE	17	21	84	TRUE	TRUE	14	53	54	TRUE	FALSE	137	85	TRUE	142	73	11	55	1947	2040.5	55	-440	-346.5
11	FALSE	86	FALSE	30	59	8	FALSE	TRUE	17	31	71	FALSE	TRUE	9	71	67	TRUE	FALSE	150	60	TRUE	127	56	66	54	1911	2002.8	55	-440	-346.5
12	FALSE	12	FALSE	5	87	17	TRUE	TRUE	20	23	66	TRUE	TRUE	4	81	82	FALSE	FALSE	63	88	TRUE	102	87	59	34	2448	2505.8	36	-925	-863.8
13	FALSE	46	FALSE	27	70	15	TRUE	TRUE	19	34	80	FALSE	FALSE	4	56	84	FALSE	FALSE	18	86	TRUE	81	65	36	47	1605	1684.9	44	-118	-43.2
14	FALSE	47	TRUE	16	26	15	TRUE	FALSE	44	18	78	TRUE	FALSE	7	80	93	FALSE	TRUE	110	98	FALSE	109	81	10	54	1572	1663.8	48	288	369.6
15	FALSE	34	FALSE	28	68	13	FALSE	TRUE	48	31	65	FALSE	TRUE	14	72	73	TRUE	TRUE	143	89	FALSE	94	80	10	47	1849	1928.9	33	-385	-328.9
16	FALSE	79	FALSE	5	41	22	TRUE	TRUE	28	19	74	FALSE	TRUE	13	91	93	TRUE	TRUE	140	89	FALSE	84	36	19	43	1669	1742.1	29	-749	-699.7
17	FALSE	57	FALSE	9	30	22	TRUE	TRUE	18	24	74	TRUE	TRUE	3	100	88	FALSE	FALSE	130	20	TRUE	91	52	66	59	1970	2070.3	58	-1025	-926.4
18	FALSE	54	FALSE	20	46	5	TRUE	TRUE	14	35	80	FALSE	TRUE	14	70	78	TRUE	FALSE	59	74	TRUE	101	84	13	49	1964	2047.3	50	-850	-765
19	FALSE	5	FALSE	16	38	13	TRUE	TRUE	34	30	69	TRUE	TRUE	6	62	70	TRUE	FALSE	79	16	TRUE	149	63	79	34	1729	1786.8	37	-435	-372.1
20	FALSE	21	TRUE	7	31	18	TRUE	TRUE	9	21	71	TRUE	FALSE	8	89	88	FALSE	TRUE	143	81	FALSE	61	27	52	50	1550	1635	35	525	584.5
21	FALSE	81	FALSE	16	87	15	TRUE	TRUE	11	20	81	TRUE	FALSE	2	57	61	FALSE	FALSE	76	21	TRUE	135	75	27	37	1896	1958.9	47	-582	-502.1
22	FALSE	16	FALSE	27	69	13	TRUE	TRUE	23	17	78	TRUE	TRUE	3	70	90	FALSE	TRUE	89	89	FALSE	148	64	60	38	1958	2022.6	26	534	578.2
23	FALSE	11	FALSE	30	87	21	TRUE	TRUE	8	24	77	TRUE	TRUE	3	76	76	FALSE	TRUE	145	96	FALSE	48	65	11	42	2234	2305.4	35	255	314.5
24	FALSE	7	FALSE	22	19	6	TRUE	TRUE	11	19	78	TRUE	FALSE	15	91	52	FALSE	FALSE	67	31	TRUE	126	83	62	32	1730	1784.4	30	-258	-207
25	FALSE	9	FALSE	7	48	20	TRUE	TRUE	10	15	66	TRUE	TRUE	2	75	59	FALSE	TRUE	148	86	FALSE	26	95	30	50	2486	2571	36	-756	-694.8
26	FALSE	79	TRUE	21	69	19	FALSE	TRUE	25	20	71	FALSE	FALSE	5	78	62	FALSE	FALSE	67	27	TRUE	72	89	11	54	1658	1749.8	50	-41	44
27	TRUE	6	TRUE	21	21	16	TRUE	TRUE	48	20	68	FALSE	TRUE	15	88	57	TRUE	TRUE	137	97	FALSE	29	86	55	49	1565	1648.3	38	-410	-345.4
28	FALSE	20	FALSE	23	100	10	TRUE	TRUE	15	24	68	TRUE	TRUE	4	96	84	FALSE	FALSE	126	62	TRUE	110	83	56	40	1926	1994	36	-748	-686.8
29	FALSE	31	FALSE	12	49	20	TRUE	TRUE	39	35	73	TRUE	TRUE	10	80	72	TRUE	FALSE	17	44	TRUE	94	66	41	45	2258	2334.5	47	-769	-689.1
30	FALSE	24	TRUE	21	53	12	FALSE	TRUE	22	22	80	FALSE	FALSE	15	66	55	TRUE	TRUE	147	56	FALSE	88	85	18	65	1638	1748.5	46	266	344.2
31	FALSE	86	FALSE	17	77	17	TRUE	TRUE	13	19	80	TRUE	FALSE	8	77	52	FALSE	FALSE	54	90	TRUE	144	73	73	32	1748	1802.4	31	436	488.7
32	FALSE	82	FALSE	26	52	8	TRUE	FALSE	35	35	74	FALSE	TRUE	11	51	75	TRUE	FALSE	47	93	TRUE	149	75	76	35	1631	1690.5	36	-1180	-1118.8
33	FALSE	85	FALSE	9	12	5	TRUE	TRUE	25	31	67	FALSE	TRUE	4	85	90	TRUE	FALSE	86	77	TRUE	136	86	27	33	2352	2408.1	39	-816	-749.7
34	FALSE	38	FALSE	7	18	6	TRUE	TRUE	16	33	69	TRUE	TRUE	14	70	87	TRUE	TRUE	138	86	FALSE	56	51	22	58	2180	2278.6	42	-252	-180.6
35	FALSE	86	FALSE	22	29	23	TRUE	TRUE	25	34	68	TRUE	TRUE	15	87	51	TRUE	FALSE	110	62	TRUE	150	78	12	45	2298	2374.5	45	534	610.5
36	FALSE	37	FALSE	29	62	12	TRUE	TRUE	7	19	70	FALSE	TRUE	11	68	76	TRUE	TRUE	131	63	FALSE	66	98	11	73	1609	1733.1	54	-492	-400.2
37	FALSE	84	FALSE	22	71	16	TRUE	TRUE	24	29	66	FALSE	FALSE	12	73	52	TRUE	FALSE	35	46	TRUE	142	60	68	36	1716	1777.2	46	-788	-709.8
38	FALSE	62	FALSE	25	90	12	FALSE	TRUE	9	33	81	TRUE	TRUE	14	74	91	TRUE	TRUE	133	98	FALSE	45	28	40	59	2072	2172.3	34	-560	-502.2
39	FALSE	77	FALSE	13	58	5	TRUE	TRUE	20	15	78	FALSE	TRUE	2	65	76	FALSE	FALSE	78	64	TRUE	94	70	26	32	2116	2170.4	23	-8	31.1
40	FALSE	26	TRUE	7	33	5	TRUE	FALSE	9	26	79	FALSE	FALSE	5	59	65	TRUE	TRUE	55	93	FALSE	112	48	69	108	1796	1979.6	83	1161	1302.1
41	FALSE	62	FALSE	29	37	22	FALSE	TRUE	5	21	66	FALSE	TRUE	4	90	63	FALSE	FALSE	127	77	TRUE	28	55	12	191	1967	2291.7	154	-270	-8.2
42	FALSE	5	FALSE	6	13	7	TRUE	TRUE	27	32	66	TRUE	TRUE	5	54	68	TRUE	FALSE	132	37	TRUE	146	79	21	40	2336	2404	45	-489	-412.5
43	FALSE	41	FALSE	22	87	20	TRUE	TRUE	23	26	81	FALSE	TRUE	2	56	65	TRUE	TRUE	144	86	FALSE	103	17	80	37	1648	1710.9	27	-482	-436.1
44	FALSE	55	TRUE	27	35	6	TRUE	TRUE	6	35	73	FALSE	FALSE	15	95	77	TRUE	TRUE	29	85	FALSE	124	19	77	235	1571	1970.5	173	343	637.1
45	FALSE	89	FALSE	20	23	8	FALSE	TRUE	17	23	80	TRUE	TRUE	4	73	93	FALSE	FALSE	113	69	TRUE	75	90	32	44	1806	1880.8	32	-204	-149.6
46	FALSE	15	FALSE	27	98	20	FALSE	FALSE	6	31	72	FALSE	TRUE	13	64	58	TRUE	FALSE	99	94	TRUE	129	71	48	44	1628	1702.8	46	-138	-59.8
47	FALSE	68	FALSE	25	64	8	FALSE	TRUE	8	23	81	FALSE	TRUE	2	74	90	TRUE	FALSE	55	97	TRUE	131	85	10	42	1876	1947.4	42	-154	-82.6
48	FALSE	45	FALSE	23	64	9	FALSE	TRUE	33	35	85	FALSE	TRUE	8	67	51	TRUE	FALSE	59	25	TRUE	125	84	19	44	2080	2154.8	38	703	767.6
49	FALSE	40	FALSE	24	27	18	TRUE	TRUE	19	34	82	FALSE	TRUE	12	77	99	TRUE	FALSE	44	24	TRUE	128	64	74	39	2224	2290.3	41	-182	-112.3
50	FALSE	34	FALSE	24	32	12	TRUE	FALSE	38	15	82	TRUE	TRUE	12	63	91	TRUE	FALSE	89	40	TRUE	138	100	10	31	1578	1630.7	29	-820	-770.7
51	FALSE	71	FALSE	30	50	13	TRUE	TRUE	43	18	67	TRUE	TRUE	15	89	56	TRUE	TRUE	143	69	FALSE	97	61	53	59	1653	1753.3	44	-280	-205.2
52	FALSE	54	FALSE	13	84	22	FALSE	TRUE	8	30	77	TRUE	FALSE	8	54	57	TRUE	TRUE	145	90	FALSE	20	11	12	51	2225	2311.7	35	-95	-35.5
53	FALSE	25	TRUE	25	73	22	FALSE	TRUE	30	17	78	FALSE	TRUE	11	69	56	TRUE	FALSE	89	62	TRUE	68	89	54	87	2021	2168.9	63	-342	-234.9
54	FALSE	46	FALSE	9	79	15	FALSE	TRUE	7	31	85	TRUE	TRUE	9	85	67	FALSE	FALSE	67	47	TRUE	32	59	14	173	2204	2498.1	136	236	467.2
55	FALSE	89	FALSE	12	83	17	TRUE	TRUE	18	33	77	TRUE	TRUE	14	97	81	TRUE	FALSE	116	52	TRUE	121	92	13	38	2125	2189.6	36	333	394.2
56	FALSE	31	FALSE	15	83	13	TRUE	TRUE	7	31	65	FALSE	FALSE	11	90	54	FALSE	FALSE	53	97	TRUE	65	81	18	61	1485	1588.7	50	-94	-9
57	FALSE	38	FALSE	21	68	8	FALSE	TRUE	26	34	68	FALSE	TRUE	2	65	72	FALSE	FALSE	103	97	TRUE	131	83	10	36	2414	2475.2	39	227	293.3
58	FALSE	60	TRUE	29	68	25	FALSE	FALSE	21	35	74	TRUE	TRUE	6	80	84	FALSE	TRUE	56	96	FALSE	54	37	21	105	1624	1802.5	86	408	554.2
59	FALSE	54	FALSE	7	29	20	FALSE	TRUE	20	15	80	TRUE	FALSE	1	93	68	TRUE	FALSE	16	12	TRUE	102	99	46	13	2088	2110.1	17	-608	-579.1
60	FALSE	64	FALSE	13	94	8	TRUE	TRUE	11	35	69	TRUE	TRUE	11	74	89	TRUE	TRUE	138	80	FALSE	46	45	66	64	1856	1964.8	40	-584	-516
61	FALSE	11	FALSE	9	42	5	TRUE	TRUE	27	33	68	FALSE	FALSE	4	84	70	FALSE	FALSE	48	13	TRUE	102	63	40	38	2146	2210.6	40	-320	-252
62	FALSE	74	FALSE	16	21	7	TRUE	TRUE	7	34	80	TRUE	FALSE	15	95	75	FALSE	FALSE	145	41	TRUE	104	62	66	64	1654	1762.8	51	-124	-37.3
63	FALSE	50	FALSE	21	61	21	TRUE	TRUE	7	27	66	FALSE	FALSE	15	88	81	TRUE	TRUE	149	98	FALSE	85	83	41	43	2208	2281.1	28	1702	1749.6
64	FALSE	41	FALSE	14	92	10	FALSE	TRUE	24	18	79	FALSE	TRUE	13	97	53	TRUE	TRUE	134	90	FALSE	117	85	32	47	1818	1897.9	34	-596	-538.2
65	FALSE	86	FALSE	12	32	13	TRUE	FALSE	37	19	84	FALSE	TRUE	14	68	93	TRUE	TRUE	144	91	FALSE	56	18	52	43	1962	2035.1	29	-759	-709.7
66	FALSE	49	FALSE	15	83	15	FALSE	TRUE	6	21	65	TRUE	TRUE	12	70	94	TRUE	TRUE	149	56	FALSE	58	97	41	68	1932	2047.6	58	-788	-689.4
67	FALSE	14	FALSE	27	95	9	TRUE	TRUE	27	24	73	FALSE	TRUE	15	80	78	TRUE	FALSE	139	72	TRUE	121	59	51	47	2099	2178.9	43	40	113.1
68	FALSE	76	FALSE	15	50	13	TRUE	TRUE	5	27	66	FALSE	TRUE	14	89	74	TRUE	TRUE	140	60	FALSE	45	83	41	70	1400	1519	63	-1780	-1672.9
69	FALSE	62	FALSE	20	42	12	TRUE	TRUE	9	35	73	TRUE	TRUE	13	66	99	TRUE	TRUE	144	91	FALSE	139	89	73	59	1916	2016.3	41	264	333.7
70	FALSE	70	FALSE	19	32	24	FALSE	FALSE	7	23	74	TRUE	TRUE	14	81	99	TRUE	FALSE	70	96	TRUE	120	84	20	38	1512	1576.6	28	-592	-544.4
71	FALSE	48	FALSE	24	72	21	TRUE	TRUE	23	15	71	TRUE	TRUE	13	69	64	TRUE	FALSE	82	70	TRUE	133	80	14	45	2255	2331.5	43	-556	-482.9
72	FALSE	43	FALSE	13	77	6	TRUE	TRUE	5	22	76	FALSE	TRUE	3	69	56	FALSE	TRUE	76	83	FALSE	59	33	57	92	2063	2219.4	66	723	835.2
73	FALSE	30	TRUE	22	34	13	TRUE	TRUE	33	17	80	FALSE	TRUE	12	61	66	TRUE	TRUE	61	94	FALSE	109	75	51	103	1788	1963.1	68	118	233.6
74	FALSE	85	FALSE	11	77	22	FALSE	TRUE	21	26	76	FALSE	FALSE	12	95	53	FALSE	FALSE	125	28	TRUE	108	82	10	35	1840	1899.5	30	-540	-489
75	FALSE	64	TRUE	24	62	23	FALSE	TRUE	48	25	81	TRUE	FALSE	7	88	87	FALSE	TRUE	70	87	FALSE	94	79	47	101	1418	1589.7	76	767	896.2
76	FALSE	23	FALSE	7	92	24	TRUE	TRUE	6	19	82	TRUE	TRUE	1	96	88	FALSE	TRUE	145	72	FALSE	105	82	24	61	2118	2221.7	43	159	232.1
77	FALSE	62	FALSE	22	48	6	TRUE	TRUE	27	33	68	FALSE	FALSE	4	55	72	TRUE	FALSE	92	79	TRUE	94	76	10	38	2182	2246.6	41	-256	-186.3
78	FALSE	61	TRUE	29	41	12	FALSE	TRUE	46	22	69	TRUE	TRUE	14	71	98	TRUE	TRUE	65	57	FALSE	59	48	48	147	1625	1874.9	116	-24	173.2
79	FALSE	78	FALSE	16	90	22	TRUE	TRUE	11	22	81	TRUE	TRUE	3	72	88	FALSE	TRUE	146	69	FALSE	69	99	15	52	2432	2520.4	40	250	318
80	FALSE	22	FALSE	30	71	9	TRUE	TRUE	31	34	74	FALSE	TRUE	12	78	53	TRUE	FALSE	96	93	TRUE	127	87	13	42	2059	2130.4	37	635	697.9
81	FALSE	76	FALSE	21	20	18	TRUE	FALSE	14	29	69	TRUE	TRUE	14	74	82	TRUE	TRUE	134	56	FALSE	124	89	61	62	1848	1953.4	45	-1000	-923.5
82	FALSE	82	FALSE	19	50	20	TRUE	FALSE	6	32	85	FALSE	TRUE	11	61	73	TRUE	FALSE	111	86	TRUE	125	95	59	29	1949	1998.3	29	-867	-817.7
83	FALSE	32	FALSE	13	19	25	TRUE	TRUE	11	25	77	TRUE	TRUE	11	64	93	TRUE	TRUE	141	86	FALSE	63	87	21	57	2135	2231.9	41	106	175.7
84	FALSE	50	TRUE	8	22	18	TRUE	TRUE	6	23	73	TRUE	FALSE	8	93	73	FALSE	TRUE	110	96	FALSE	121	58	25	59	1752	1852.3	47	432	511.9
85	FALSE	13	TRUE	26	69	6	FALSE	TRUE	46	22	79	FALSE	TRUE	4	70	76	FALSE	TRUE	71	90	FALSE	120	10	49	92	1541	1697.4	74	424	549.8
86	FALSE	70	FALSE	24	42	13	TRUE	TRUE	15	27	77	TRUE	TRUE	2	63	61	TRUE	FALSE	149	11	TRUE	127	74	14	41	2898	2967.7	47	-211	-131.1
87	FALSE	73	FALSE	15	85	23	TRUE	TRUE	11	22	70	TRUE	TRUE	8	72	61	FALSE	FALSE	149	33	TRUE	28	70	16	188	1912	2231.6	138	222	456.6
88	FALSE	47	TRUE	8	23	15	TRUE	FALSE	23	16	82	FALSE	FALSE	12	69	73	FALSE	TRUE	110	95	FALSE	63	32	39	58	1665	1763.6	42	315	386.4
89	FALSE	75	FALSE	18	33	20	TRUE	TRUE	10	26	79	TRUE	TRUE	15	87	82	TRUE	FALSE	77	36	TRUE	129	92	13	40	1884	1952	35	524	583.5
90	FALSE	43	FALSE	26	77	16	TRUE	TRUE	13	17	80	TRUE	TRUE	3	90	55	FALSE	FALSE	84	87	TRUE	114	60	10	54	1862	1953.8	57	-640	-543.1
91	FALSE	66	TRUE	18	65	21	FALSE	TRUE	11	35	81	FALSE	FALSE	12	96	96	FALSE	TRUE	56	58	FALSE	31	64	19	162	1662	1937.4	133	-76	150.1
92	FALSE	66	TRUE	21	67	23	FALSE	TRUE	21	23	69	TRUE	TRUE	11	68	92	TRUE	FALSE	59	50	TRUE	86	91	12	45	2076	2152.5	48	-333	-251.4
93	FALSE	68	FALSE	13	88	16	FALSE	TRUE	5	28	65	FALSE	FALSE	6	92	65	TRUE	FALSE	103	59	TRUE	31	95	34	169	2215	2502.3	116	-58	139.2
94	FALSE	47	FALSE	19	20	18	FALSE	TRUE	14	25	70	TRUE	TRUE	7	91	96	FALSE	FALSE	89	86	TRUE	139	46	31	75	1695	1822.5	79	-224	-89.7
95	FALSE	80	FALSE	21	61	16	TRUE	TRUE	5	17	65	FALSE	TRUE	7	82	57	TRUE	FALSE	126	67	TRUE	129	66	24	68	1779	1894.6	60	-48	54
96	FALSE	38	FALSE	16	43	18	FALSE	TRUE	15	16	77	TRUE	TRUE	4	79	94	FALSE	FALSE	30	79	TRUE	130	48	70	43	2104	2177.1	44	-82	-7.2
97	FALSE	42	FALSE	15	50	21	TRUE	FALSE	27	18	68	FALSE	TRUE	7	62	80	TRUE	FALSE	128	72	TRUE	106	98	34	28	1574	1621.6	25	-750	-707.5
98	FALSE	55	FALSE	11	81	17	TRUE	TRUE	5	18	66	TRUE	TRUE	3	69	76	FALSE	FALSE	50	65	TRUE	131	90	11	43	2027	2100.1	40	-58	10
99	FALSE	51	FALSE	19	67	21	TRUE	FALSE	12	21	85	FALSE	TRUE	14	72	67	TRUE	FALSE	142	94	TRUE	110	73	42	37	2381	2443.9	38	-575	-510.4
100	FALSE	45	TRUE	12	33	21	TRUE	TRUE	20	23	83	FALSE	FALSE	13	60	72	FALSE	TRUE	61	94	FALSE	64	88	31	108	1473	1656.6	67	677	790.9

## Sheet: Simulation3
Individual	Boolean_EMA	Nr_periods_EMA	Boolean_MACD	Periods_short_MA	Periods_long_MA	Periods_signal_MACD	Boolean_signal	Boolean_RSI	Periods_RSI	Oversold_signal_RSI	Overbought_signal_RSI	Boolean_signal_RSI	Boolean_Filter	Periods_Filter	Increase_signal_Filter	Decrease_signal_Filter	Boolean_trader_type_Filter	Boolean_fixed_exit	TP_fixed	SL_fixed	Boolean_trailing_exit	TP_trailing	SL_trailing	Trailing_level	nbTransactionsTraining	trainingProfit	trainingProfitNoCost	nbTransactionsTesting	testingProfit	testingProfitNoCost
1	FALSE	6	TRUE	19	59	16	FALSE	TRUE	26	30	78	TRUE	FALSE	15	73	93	FALSE	FALSE	67	86	TRUE	62	59	53	144	2145	2389.8	113	609	801.1
2	FALSE	71	FALSE	25	93	8	TRUE	TRUE	10	26	79	TRUE	TRUE	4	76	100	FALSE	FALSE	24	57	TRUE	73	75	27	59	1845	1945.3	50	256	341
3	FALSE	82	FALSE	22	55	10	TRUE	TRUE	7	22	76	TRUE	TRUE	4	95	94	FALSE	FALSE	108	100	TRUE	56	57	13	107	2428	2609.9	93	-1012	-853.9
4	FALSE	52	FALSE	24	76	6	TRUE	TRUE	44	18	65	FALSE	TRUE	4	81	83	FALSE	TRUE	143	58	FALSE	127	99	27	33	1704	1760.1	23	73	112.1
5	FALSE	66	FALSE	7	44	9	TRUE	TRUE	6	21	81	TRUE	FALSE	12	68	78	FALSE	TRUE	148	97	FALSE	34	35	51	48	1959	2040.6	33	-261	-204.9
6	FALSE	42	FALSE	14	18	18	FALSE	TRUE	10	15	77	TRUE	TRUE	1	66	74	TRUE	TRUE	139	93	FALSE	144	32	45	45	2079	2155.5	36	-332	-270.8
7	FALSE	9	TRUE	24	62	7	FALSE	FALSE	42	20	70	TRUE	FALSE	8	56	68	FALSE	TRUE	52	59	FALSE	26	89	71	170	1514	1803	143	-1	242.1
8	FALSE	53	TRUE	16	28	23	TRUE	TRUE	5	31	66	FALSE	TRUE	4	54	79	FALSE	TRUE	110	94	FALSE	66	75	65	55	2174	2267.5	41	430	499.7
9	FALSE	61	FALSE	11	14	25	TRUE	TRUE	27	28	65	FALSE	FALSE	14	74	99	TRUE	FALSE	19	93	TRUE	116	85	24	33	2022	2078.1	38	-1598	-1533.4
10	FALSE	21	FALSE	22	44	13	FALSE	TRUE	10	33	73	TRUE	TRUE	4	65	96	FALSE	TRUE	139	50	FALSE	110	17	51	71	2498	2618.7	58	-632	-533.4
11	FALSE	32	FALSE	24	49	13	TRUE	TRUE	19	31	79	FALSE	FALSE	10	74	97	TRUE	FALSE	28	82	TRUE	104	77	29	37	1884	1946.9	40	-50	18
12	FALSE	50	FALSE	15	41	24	FALSE	TRUE	23	26	70	TRUE	FALSE	9	50	71	FALSE	FALSE	18	34	TRUE	104	99	27	27	1972	2017.9	32	-1170	-1115.6
13	FALSE	33	FALSE	26	59	23	TRUE	TRUE	10	16	76	TRUE	TRUE	2	80	73	FALSE	TRUE	144	98	FALSE	43	22	11	43	2320	2393.1	32	-232	-177.6
14	FALSE	69	FALSE	28	40	5	TRUE	TRUE	32	34	74	TRUE	TRUE	14	51	66	TRUE	FALSE	130	48	TRUE	145	91	13	39	2236	2302.3	44	-1378	-1303.2
15	FALSE	56	TRUE	30	93	22	TRUE	TRUE	29	30	75	FALSE	FALSE	11	56	91	FALSE	TRUE	98	50	FALSE	130	44	65	108	1408	1591.6	90	-504	-351
16	FALSE	60	FALSE	9	21	20	TRUE	FALSE	22	35	74	FALSE	TRUE	11	64	68	TRUE	FALSE	56	65	TRUE	133	93	38	34	1700	1757.8	32	-506	-451.6
17	FALSE	25	FALSE	28	86	7	TRUE	TRUE	21	21	75	FALSE	TRUE	11	77	68	TRUE	FALSE	138	11	TRUE	134	95	48	30	2083	2134	32	-1552	-1497.6
18	FALSE	17	FALSE	24	82	15	TRUE	TRUE	44	28	65	FALSE	TRUE	14	69	52	TRUE	TRUE	144	92	FALSE	97	90	61	54	1876	1967.8	36	-244	-182.8
19	FALSE	29	FALSE	26	61	6	TRUE	TRUE	22	18	79	TRUE	FALSE	3	87	95	TRUE	FALSE	32	14	TRUE	88	96	33	17	1725	1753.9	19	-235	-202.7
20	FALSE	78	FALSE	15	78	13	TRUE	TRUE	10	16	81	TRUE	FALSE	4	83	50	FALSE	TRUE	144	100	FALSE	125	89	74	39	1956	2022.3	32	-1004	-949.6
21	FALSE	77	FALSE	10	50	7	TRUE	TRUE	24	19	78	TRUE	TRUE	4	90	55	TRUE	TRUE	140	95	FALSE	26	32	57	37	1655	1717.9	24	-400	-359.2
22	FALSE	78	FALSE	26	84	20	FALSE	FALSE	20	35	81	FALSE	TRUE	15	69	77	TRUE	FALSE	45	56	TRUE	138	91	60	30	1999	2050	27	-657	-611.1
23	FALSE	14	FALSE	21	66	17	FALSE	TRUE	28	27	66	FALSE	FALSE	1	94	89	TRUE	FALSE	42	26	TRUE	126	79	12	32	1974	2028.4	35	-1109	-1049.5
24	FALSE	42	FALSE	30	48	16	TRUE	TRUE	16	33	72	TRUE	TRUE	11	79	100	FALSE	TRUE	18	62	FALSE	62	96	10	193	1634	1962.1	153	194	454.1
25	FALSE	44	TRUE	19	72	6	FALSE	FALSE	38	32	69	TRUE	FALSE	13	79	65	TRUE	TRUE	59	56	FALSE	98	50	69	152	1608	1866.4	129	-209	10.3
26	FALSE	57	TRUE	29	95	25	TRUE	TRUE	30	22	73	TRUE	TRUE	2	89	79	TRUE	TRUE	69	57	FALSE	125	97	72	142	1860	2101.4	114	-702	-508.2
27	FALSE	41	TRUE	28	32	6	TRUE	FALSE	39	35	65	TRUE	TRUE	15	60	76	TRUE	FALSE	68	94	TRUE	32	97	26	172	2049	2341.4	121	-22	183.7
28	FALSE	68	TRUE	19	35	13	TRUE	TRUE	22	34	71	TRUE	FALSE	9	88	84	TRUE	TRUE	112	97	FALSE	103	82	31	55	2189	2282.5	34	464	521.8
29	FALSE	24	FALSE	13	75	11	FALSE	TRUE	12	17	81	TRUE	TRUE	8	68	79	TRUE	FALSE	38	32	TRUE	140	61	62	36	2392	2453.2	49	-695	-611.7
30	FALSE	80	FALSE	7	30	19	TRUE	TRUE	15	18	77	TRUE	FALSE	2	59	69	FALSE	FALSE	55	69	TRUE	136	60	10	42	1878	1949.4	49	-900	-816.7
31	FALSE	79	FALSE	22	100	10	TRUE	TRUE	13	25	85	FALSE	TRUE	10	85	85	TRUE	FALSE	135	11	TRUE	139	98	25	30	2147	2198	36	-1603	-1541.8
32	FALSE	57	FALSE	25	85	8	TRUE	TRUE	25	30	80	TRUE	TRUE	2	99	58	TRUE	TRUE	142	96	FALSE	138	76	67	34	1496	1553.8	26	598	642.2
33	FALSE	6	TRUE	21	66	16	FALSE	TRUE	36	32	84	TRUE	TRUE	10	70	80	TRUE	FALSE	88	79	TRUE	68	90	22	49	1736	1819.3	48	-762	-680.4
34	FALSE	14	FALSE	27	77	18	TRUE	TRUE	14	17	68	FALSE	TRUE	4	89	70	FALSE	TRUE	74	60	FALSE	18	49	16	89	1360	1511.3	62	-236	-130.6
35	FALSE	25	TRUE	25	46	6	FALSE	TRUE	29	19	69	TRUE	TRUE	7	91	82	TRUE	TRUE	135	57	FALSE	44	12	74	74	1542	1667.8	53	435	525.1
36	FALSE	66	FALSE	6	55	16	TRUE	TRUE	22	23	81	TRUE	TRUE	13	86	91	TRUE	FALSE	24	35	TRUE	132	78	10	35	2020	2079.5	37	-776	-713.1
37	TRUE	14	FALSE	25	62	25	TRUE	TRUE	17	33	70	FALSE	TRUE	15	84	57	TRUE	TRUE	142	95	FALSE	114	53	41	44	1982	2056.8	28	895	942.6
38	FALSE	87	FALSE	17	21	14	TRUE	TRUE	31	21	73	FALSE	TRUE	10	84	51	TRUE	TRUE	148	99	FALSE	19	77	17	42	1523	1594.4	31	142	194.7
39	FALSE	60	FALSE	13	34	21	TRUE	TRUE	26	31	66	TRUE	TRUE	3	89	95	FALSE	FALSE	23	29	TRUE	101	83	31	39	2331	2397.3	38	159	223.6
40	FALSE	30	FALSE	12	50	14	TRUE	TRUE	5	32	71	TRUE	FALSE	15	75	84	FALSE	FALSE	71	73	TRUE	143	45	37	97	1783	1947.9	84	31	173.8
41	FALSE	6	TRUE	13	32	17	TRUE	TRUE	6	23	67	TRUE	FALSE	2	99	68	FALSE	TRUE	108	99	FALSE	37	74	15	59	2232	2332.3	51	333	419.7
42	FALSE	11	TRUE	19	35	15	TRUE	TRUE	7	35	72	TRUE	FALSE	15	67	90	FALSE	TRUE	107	93	FALSE	60	32	30	65	1555	1665.5	49	443	526.3
43	FALSE	32	FALSE	21	71	21	TRUE	FALSE	28	29	80	TRUE	TRUE	10	71	61	TRUE	TRUE	128	100	FALSE	100	68	56	52	1640	1728.4	30	-264	-213
44	TRUE	60	FALSE	15	98	17	TRUE	TRUE	5	19	67	TRUE	FALSE	14	81	92	TRUE	FALSE	121	74	TRUE	30	71	10	196	1769	2102.2	157	-365	-98.1
45	FALSE	73	FALSE	29	72	16	TRUE	FALSE	22	24	75	FALSE	TRUE	6	65	62	TRUE	FALSE	55	91	TRUE	141	99	41	28	1814	1861.6	19	743	775.3
46	FALSE	64	FALSE	25	62	5	FALSE	TRUE	17	31	75	TRUE	FALSE	4	78	53	TRUE	FALSE	54	64	TRUE	110	80	27	41	1555	1624.7	39	68	134.3
47	FALSE	29	FALSE	21	29	14	TRUE	TRUE	43	15	72	FALSE	TRUE	14	72	66	TRUE	TRUE	66	72	FALSE	89	47	44	88	1530	1679.6	57	-102	-5.1
48	FALSE	5	FALSE	6	19	22	TRUE	TRUE	11	34	74	TRUE	TRUE	3	75	77	FALSE	FALSE	33	62	TRUE	89	89	31	44	2166	2240.8	40	-236	-168
49	FALSE	50	TRUE	29	41	15	FALSE	FALSE	49	15	69	TRUE	TRUE	13	96	90	TRUE	FALSE	149	42	TRUE	58	62	48	142	1876	2117.4	105	114	292.5
50	FALSE	70	FALSE	12	70	17	FALSE	TRUE	48	17	84	TRUE	TRUE	12	91	86	TRUE	TRUE	118	97	FALSE	62	48	16	46	1773	1851.2	27	-469	-423.1
51	FALSE	55	FALSE	23	67	20	TRUE	TRUE	26	30	67	FALSE	TRUE	15	66	86	TRUE	TRUE	148	100	FALSE	26	21	27	46	1848	1926.2	34	72	129.8
52	FALSE	37	TRUE	12	29	25	TRUE	FALSE	23	23	80	FALSE	TRUE	12	65	60	TRUE	FALSE	99	66	TRUE	59	94	56	102	1846	2019.4	72	-342	-219.6
53	FALSE	30	FALSE	22	36	20	TRUE	TRUE	18	29	74	FALSE	TRUE	9	68	75	TRUE	FALSE	137	52	TRUE	150	52	79	41	2371	2440.7	54	-359	-267.2
54	FALSE	13	FALSE	6	57	21	TRUE	TRUE	10	27	71	TRUE	TRUE	4	96	95	FALSE	TRUE	118	73	FALSE	136	43	60	71	2266	2386.7	49	-330	-246.7
55	FALSE	71	TRUE	6	37	8	TRUE	TRUE	37	26	68	FALSE	FALSE	2	65	60	FALSE	TRUE	111	95	FALSE	51	79	36	56	1684	1779.2	43	447	520.1
56	FALSE	75	TRUE	27	77	25	TRUE	TRUE	19	31	70	TRUE	TRUE	10	68	80	TRUE	FALSE	111	58	TRUE	104	58	21	80	1711	1847	85	-757	-612.5
57	FALSE	49	TRUE	22	64	20	FALSE	TRUE	21	24	81	FALSE	FALSE	15	79	84	FALSE	FALSE	55	90	TRUE	69	56	53	115	1699	1894.5	101	-331	-159.3
58	FALSE	62	FALSE	20	25	21	TRUE	TRUE	24	24	78	TRUE	TRUE	11	69	80	TRUE	TRUE	143	70	FALSE	139	69	57	52	2111	2199.4	45	-1020	-943.5
59	FALSE	31	FALSE	7	33	6	TRUE	TRUE	5	33	68	FALSE	TRUE	2	57	59	TRUE	TRUE	148	35	FALSE	90	40	14	102	2286	2459.4	96	-249	-85.8
60	FALSE	47	FALSE	9	16	6	FALSE	TRUE	35	23	73	TRUE	TRUE	13	53	68	TRUE	FALSE	49	40	TRUE	100	54	57	67	2117	2230.9	55	-707	-613.5
61	FALSE	5	FALSE	28	64	24	TRUE	TRUE	6	23	81	TRUE	TRUE	11	69	53	TRUE	TRUE	139	84	FALSE	50	12	19	60	2096	2198	42	-406	-334.6
62	FALSE	49	TRUE	26	64	25	FALSE	FALSE	19	34	65	TRUE	TRUE	13	94	95	TRUE	FALSE	112	53	TRUE	69	58	54	119	1681	1883.3	96	208	371.2
63	FALSE	19	FALSE	28	99	18	TRUE	TRUE	21	17	67	TRUE	TRUE	4	88	92	FALSE	FALSE	21	74	TRUE	84	99	19	38	1744	1808.6	34	-542	-484.2
64	FALSE	78	FALSE	22	65	14	TRUE	TRUE	28	33	80	TRUE	TRUE	11	71	85	TRUE	FALSE	125	35	TRUE	147	60	74	38	2367	2431.6	41	-314	-244.3
65	FALSE	20	FALSE	14	41	10	TRUE	TRUE	6	29	81	TRUE	TRUE	14	98	68	TRUE	TRUE	139	59	FALSE	132	79	76	77	1991	2121.9	51	-237	-150.3
66	FALSE	71	FALSE	23	100	19	TRUE	TRUE	10	23	65	FALSE	TRUE	1	52	77	FALSE	TRUE	148	97	FALSE	101	93	11	35	1995	2054.5	29	127	176.3
67	FALSE	87	FALSE	27	96	6	FALSE	TRUE	26	35	66	FALSE	TRUE	14	66	69	TRUE	FALSE	50	69	TRUE	117	78	21	47	1773	1852.9	43	117	190.1
68	FALSE	59	TRUE	19	64	10	FALSE	TRUE	32	29	76	TRUE	FALSE	10	85	95	FALSE	FALSE	26	50	TRUE	63	62	53	134	1718	1945.8	107	483	664.9
69	FALSE	69	FALSE	27	95	9	TRUE	TRUE	12	16	75	TRUE	TRUE	11	64	74	TRUE	FALSE	109	52	TRUE	132	91	57	34	1922	1979.8	34	-1099	-1041.2
70	FALSE	64	FALSE	20	71	25	FALSE	TRUE	11	21	74	FALSE	TRUE	14	88	83	TRUE	FALSE	101	15	TRUE	83	67	67	75	1734	1861.5	65	-650	-539.5
71	FALSE	39	FALSE	15	29	14	TRUE	TRUE	31	34	72	FALSE	TRUE	14	81	78	TRUE	FALSE	132	44	TRUE	108	68	42	40	2336	2404	40	102	170
72	FALSE	65	FALSE	19	43	24	TRUE	TRUE	6	33	80	FALSE	TRUE	2	66	62	FALSE	TRUE	144	70	FALSE	47	86	23	65	1870	1980.5	42	56	127.4
73	FALSE	45	FALSE	16	29	25	TRUE	TRUE	24	21	69	FALSE	TRUE	4	55	55	FALSE	TRUE	24	81	FALSE	91	45	10	137	1503	1735.9	99	171	339.3
74	FALSE	90	FALSE	11	97	12	TRUE	TRUE	17	17	75	TRUE	TRUE	2	66	79	FALSE	FALSE	52	87	TRUE	64	85	15	44	1810	1884.8	32	365	419.4
75	FALSE	19	FALSE	28	54	23	TRUE	TRUE	6	21	83	FALSE	FALSE	1	59	83	FALSE	FALSE	60	44	TRUE	102	95	63	32	1607	1661.4	25	665	707.5
76	FALSE	10	FALSE	10	15	5	TRUE	TRUE	5	27	68	FALSE	FALSE	10	87	70	FALSE	TRUE	133	45	FALSE	34	89	63	91	1779	1933.7	74	52	177.8
77	FALSE	10	FALSE	20	21	20	TRUE	TRUE	11	31	83	TRUE	TRUE	10	92	93	TRUE	TRUE	147	94	FALSE	95	19	43	49	1901	1984.3	33	31	87.1
78	FALSE	48	FALSE	6	91	9	TRUE	TRUE	24	23	80	FALSE	TRUE	14	63	50	TRUE	TRUE	133	80	FALSE	150	57	71	58	1963	2061.6	44	-325	-250.2
79	FALSE	72	FALSE	22	69	7	TRUE	TRUE	8	23	81	FALSE	TRUE	9	66	73	TRUE	FALSE	123	25	TRUE	103	85	54	35	1963	2022.5	38	-882	-817.4
80	FALSE	76	FALSE	19	20	8	TRUE	TRUE	16	24	77	TRUE	TRUE	12	93	73	TRUE	FALSE	74	13	TRUE	120	71	49	40	2055	2123	42	-733	-661.6
81	FALSE	74	FALSE	5	29	18	TRUE	TRUE	10	22	70	FALSE	TRUE	7	65	95	TRUE	FALSE	139	60	TRUE	112	73	12	60	1539	1641	54	-390	-298.2
82	FALSE	88	TRUE	26	75	13	FALSE	TRUE	23	28	74	TRUE	TRUE	11	62	99	TRUE	FALSE	119	54	TRUE	83	97	12	41	1687	1756.7	47	-755	-675.1
83	FALSE	49	FALSE	8	38	17	TRUE	FALSE	37	26	69	FALSE	TRUE	14	74	70	TRUE	FALSE	61	39	TRUE	143	89	34	34	1768	1825.8	32	-1216	-1161.6
84	FALSE	88	FALSE	7	77	6	FALSE	TRUE	29	35	66	FALSE	TRUE	3	73	69	FALSE	FALSE	24	65	TRUE	93	94	29	32	1958	2012.4	33	-221	-164.9
85	FALSE	67	FALSE	20	40	25	TRUE	TRUE	26	35	72	FALSE	TRUE	14	70	85	TRUE	FALSE	95	84	TRUE	137	74	20	45	1830	1906.5	51	-1074	-987.3
86	FALSE	33	FALSE	14	33	16	TRUE	TRUE	17	29	70	FALSE	FALSE	2	81	56	TRUE	FALSE	104	74	TRUE	147	67	10	54	2020	2111.8	42	1006	1077.4
87	FALSE	51	FALSE	22	57	13	FALSE	TRUE	7	35	81	TRUE	TRUE	11	73	92	TRUE	TRUE	142	81	FALSE	65	60	62	52	2032	2120.4	41	-645	-575.3
88	FALSE	9	FALSE	30	53	17	TRUE	TRUE	22	18	69	TRUE	TRUE	7	54	57	FALSE	TRUE	24	92	FALSE	122	34	32	173	1716	2010.1	121	236	441.7
89	FALSE	26	FALSE	7	31	20	FALSE	TRUE	27	31	66	FALSE	TRUE	5	72	96	FALSE	FALSE	62	51	TRUE	123	83	18	36	2140	2201.2	38	364	428.6
90	FALSE	13	FALSE	5	89	9	FALSE	TRUE	21	33	73	TRUE	TRUE	2	71	76	TRUE	FALSE	109	90	TRUE	130	71	62	32	2021	2075.4	34	748	805.8
91	FALSE	17	TRUE	27	37	7	TRUE	TRUE	24	16	73	TRUE	FALSE	1	100	61	TRUE	TRUE	109	94	FALSE	32	65	24	59	1762	1862.3	49	875	958.3
92	FALSE	39	FALSE	24	60	12	TRUE	TRUE	6	22	81	FALSE	FALSE	4	75	58	TRUE	FALSE	22	42	TRUE	83	99	37	32	1886	1940.4	27	238	283.9
93	FALSE	20	FALSE	5	77	18	TRUE	TRUE	17	28	70	FALSE	TRUE	12	82	90	TRUE	FALSE	39	14	TRUE	124	58	73	49	2157	2240.3	50	-491	-406
94	FALSE	40	FALSE	17	50	17	TRUE	TRUE	31	31	73	TRUE	TRUE	15	83	52	TRUE	TRUE	139	55	FALSE	103	56	40	75	1501	1628.5	59	-529	-428.7
95	FALSE	16	FALSE	5	24	8	FALSE	TRUE	17	33	75	TRUE	TRUE	9	54	99	TRUE	TRUE	135	94	FALSE	48	86	20	51	1618	1704.7	38	-366	-301.4
96	FALSE	60	FALSE	19	64	17	TRUE	TRUE	16	27	66	FALSE	TRUE	15	95	95	TRUE	TRUE	150	97	FALSE	20	34	11	43	1510	1583.1	34	407	464.8
97	FALSE	34	FALSE	20	53	9	TRUE	TRUE	23	18	79	FALSE	TRUE	11	94	53	TRUE	TRUE	135	100	FALSE	37	23	28	49	1680	1763.3	35	-680	-620.5
98	FALSE	69	FALSE	14	63	24	FALSE	TRUE	29	34	82	TRUE	TRUE	8	68	77	TRUE	FALSE	126	49	TRUE	106	66	76	40	2120	2188	41	-746	-676.3
99	FALSE	86	FALSE	5	96	20	FALSE	TRUE	21	32	73	FALSE	FALSE	6	76	89	TRUE	FALSE	51	36	TRUE	130	80	44	28	1842	1889.6	35	412	471.5
100	FALSE	50	FALSE	24	47	5	TRUE	TRUE	43	28	69	TRUE	TRUE	2	61	86	FALSE	TRUE	146	82	FALSE	101	21	19	27	1662	1707.9	19	950	982.3

## Sheet: Notes
	Notes:
	This file contains the parameters of the individuals generated by the genetic algorithm.
	There are three sheets, each one containing the parameters (genes) of the individuals generated in each simulation.
	The first sheet contains the genes’ values of the 100 individuals generated by the first simulation.
	The second and the third sheet contain the genes’ values of the individuals generated by the additional two simulations.
